# Supplementary material for: IntroUNET: Identifying introgressed alleles via semantic segmentation
Source: PubMed Central journal article supplement (PMC10906877; doi:10.1371/journal.pgen.1010657), 2024-02-20

Training/validation loss vs. strength of label smoothing

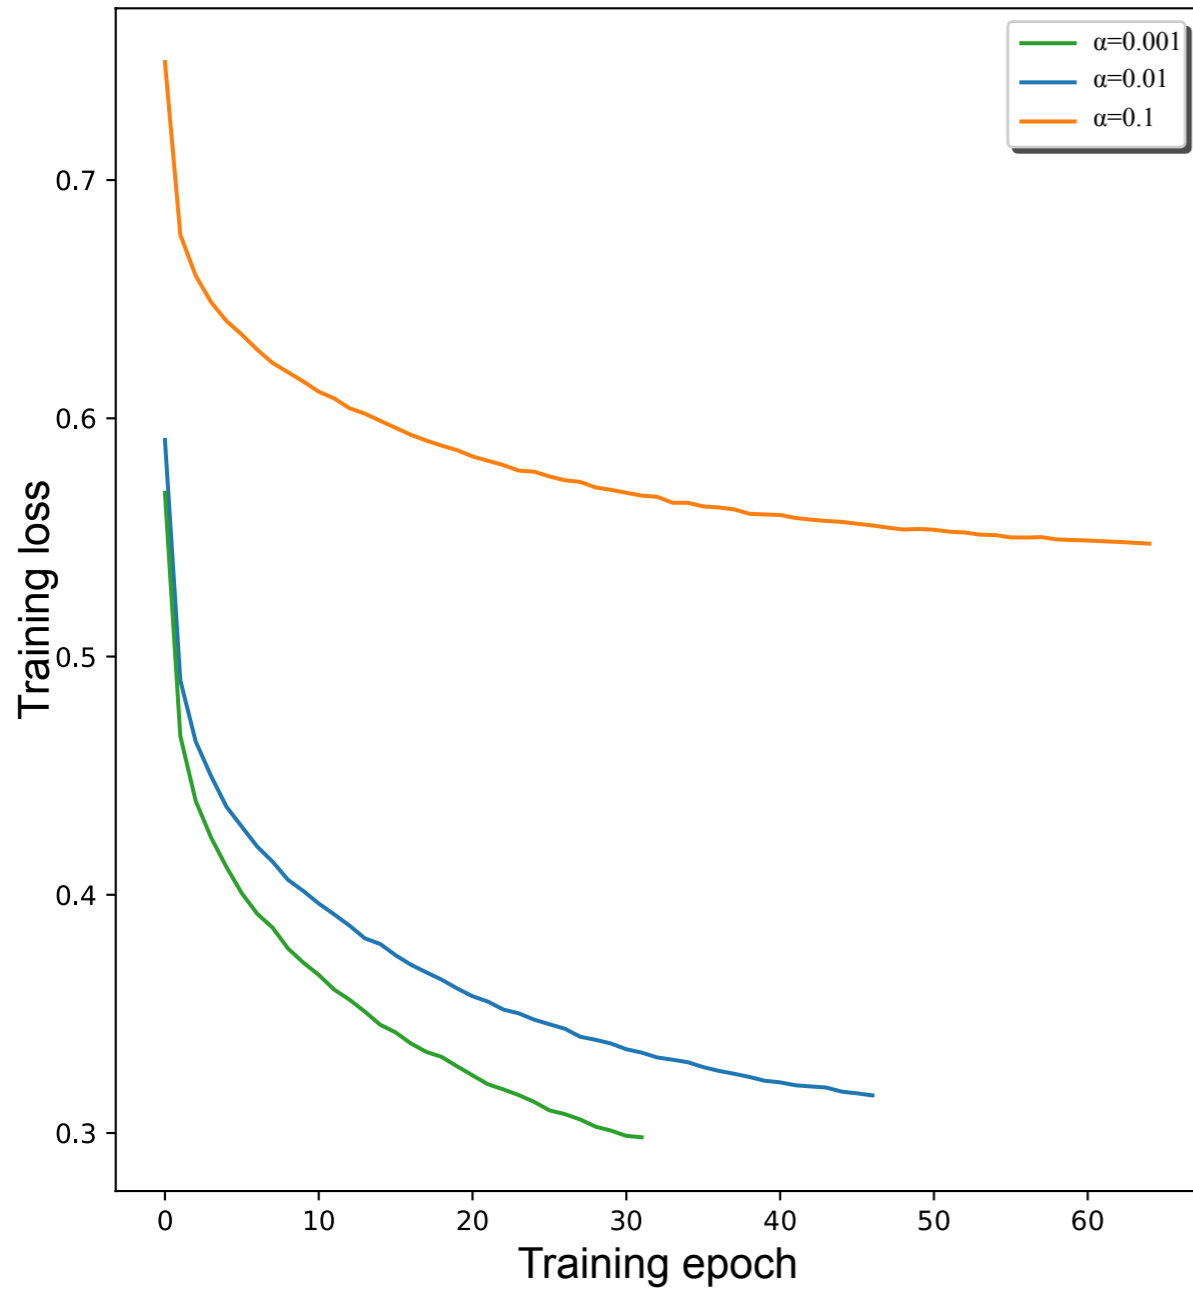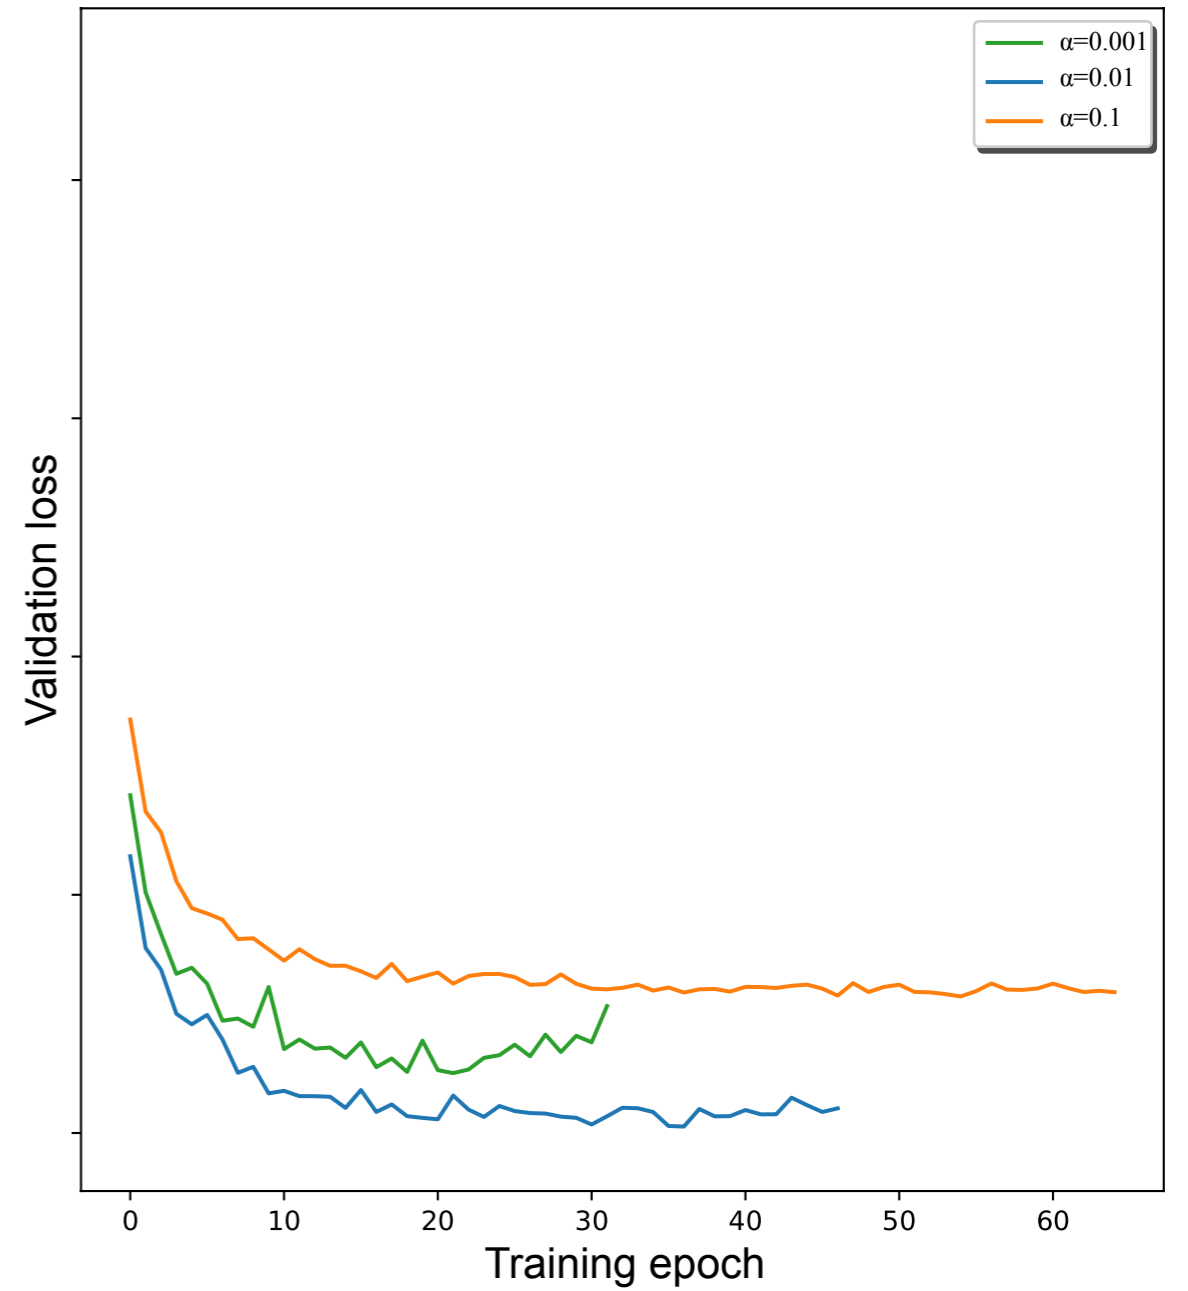

Supplement: pgen.1010657.s002.pdf [file pgen.1010657.s002.pdf]
