# Supplementary material for: IntroUNET: Identifying introgressed alleles via semantic segmentation
Source: PubMed Central journal article supplement (PMC10906877; doi:10.1371/journal.pgen.1010657), 2024-02-20
Supplement: pgen.1010657.s005.pdf [file pgen.1010657.s005.pdf]

Migration time upper bound (as a fraction of split time)

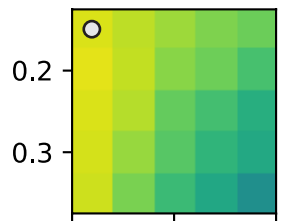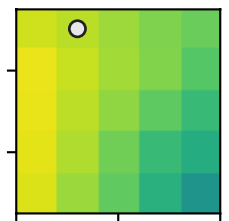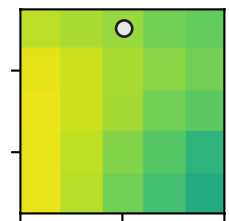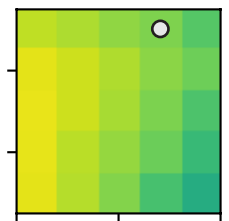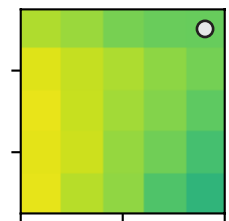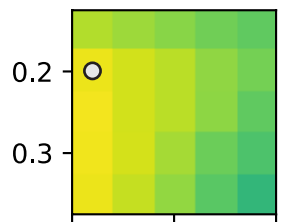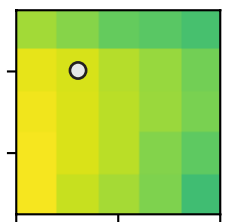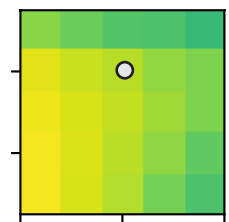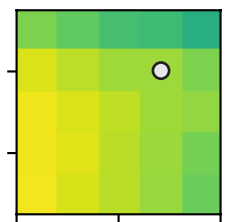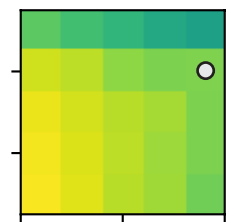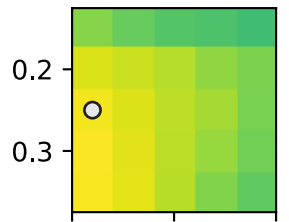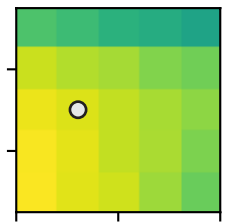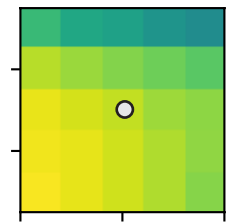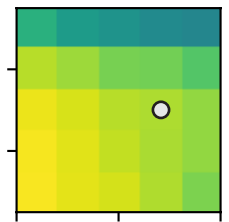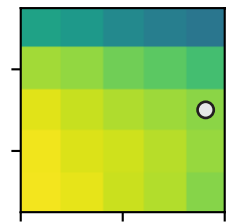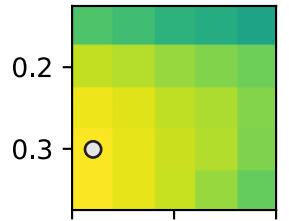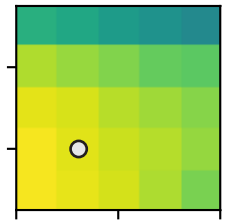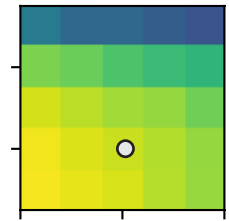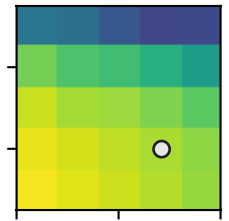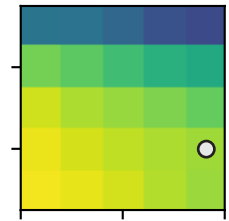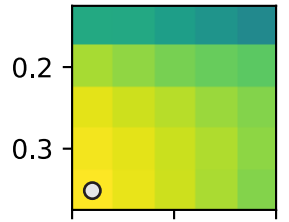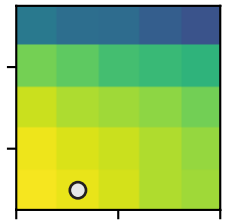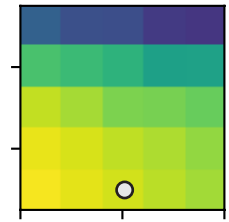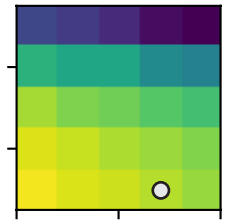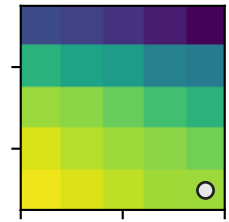

2 4 6

2 4 6

2 4 6

2 4 6

2 4 6

Split time (in units of  $N$  generations)

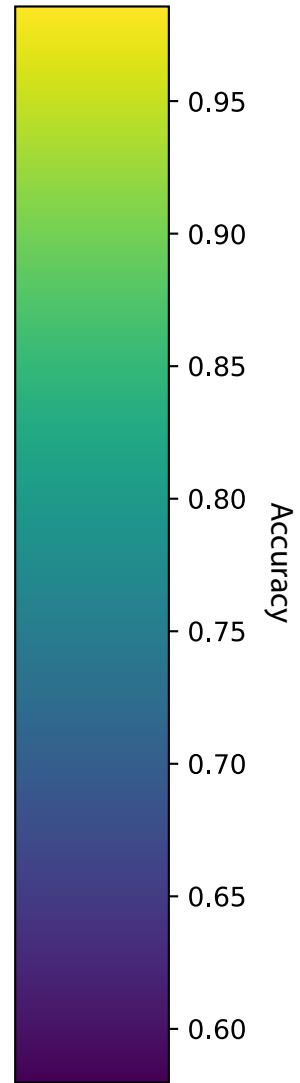

Migration time upper bound (as a fraction of split time)

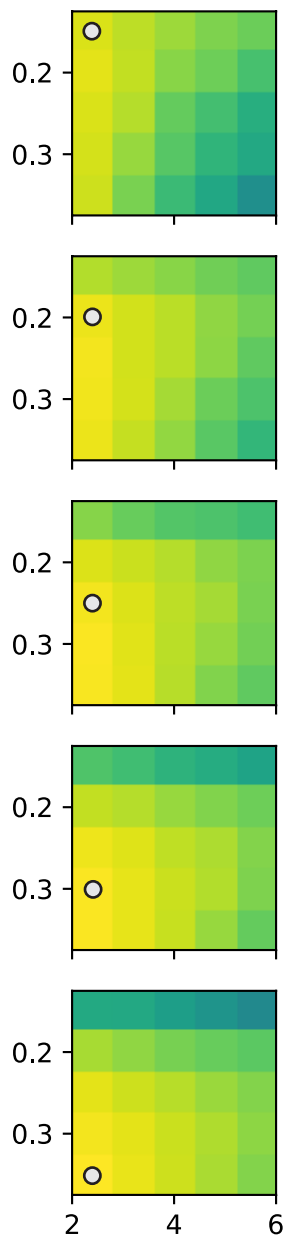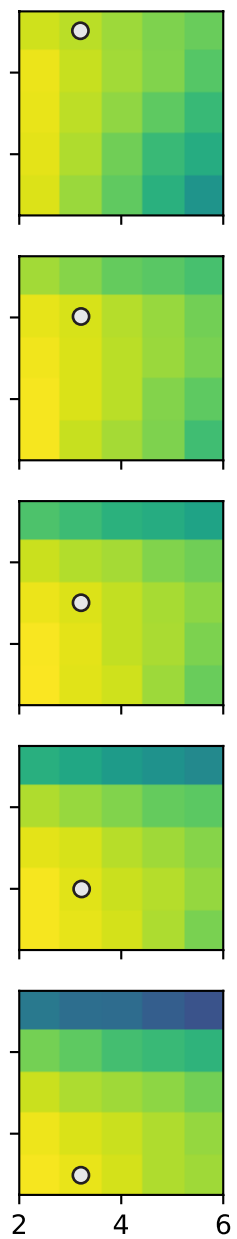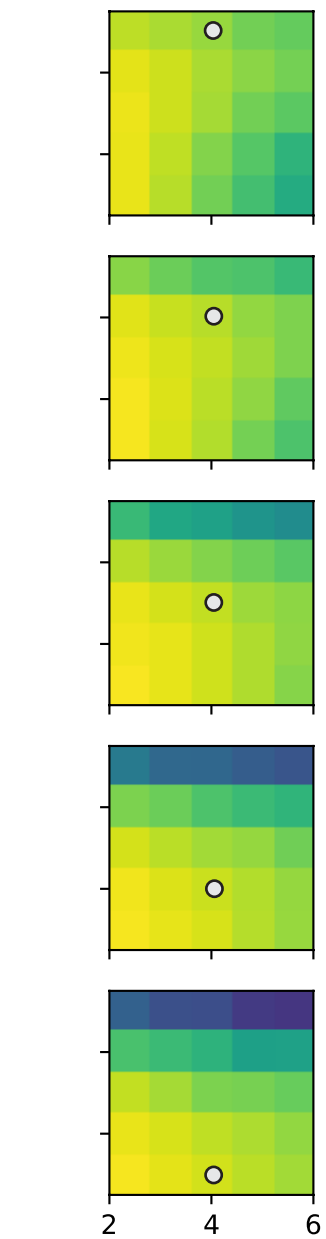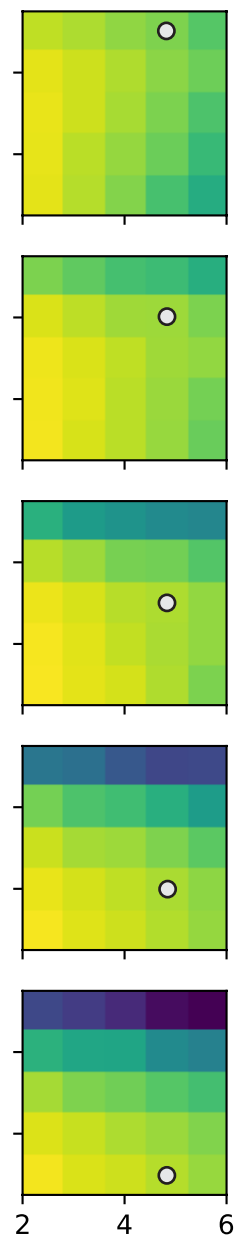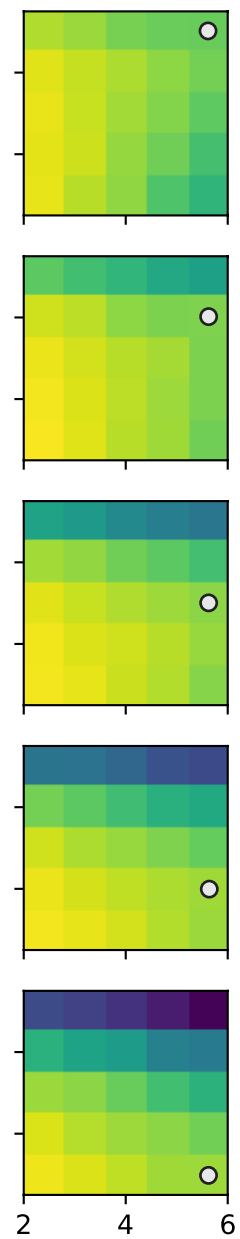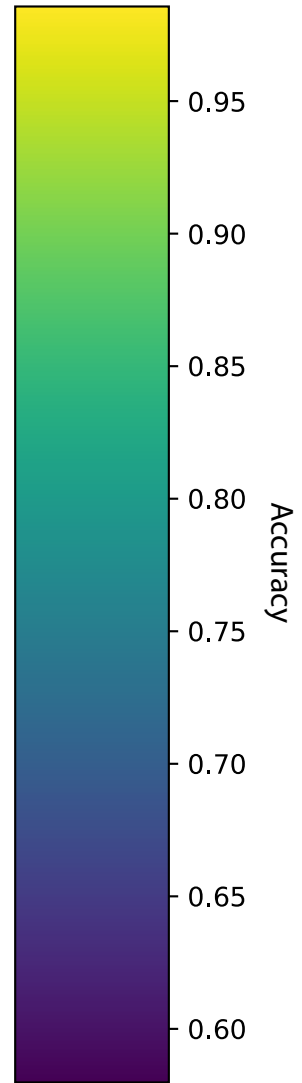

Split time (in units of  $N$  generations)
