# Supplementary material for: IntroUNET: Identifying introgressed alleles via semantic segmentation
Source: PubMed Central journal article supplement (PMC10906877; doi:10.1371/journal.pgen.1010657), 2024-02-20

Deleterious:  $s = -1e-6$

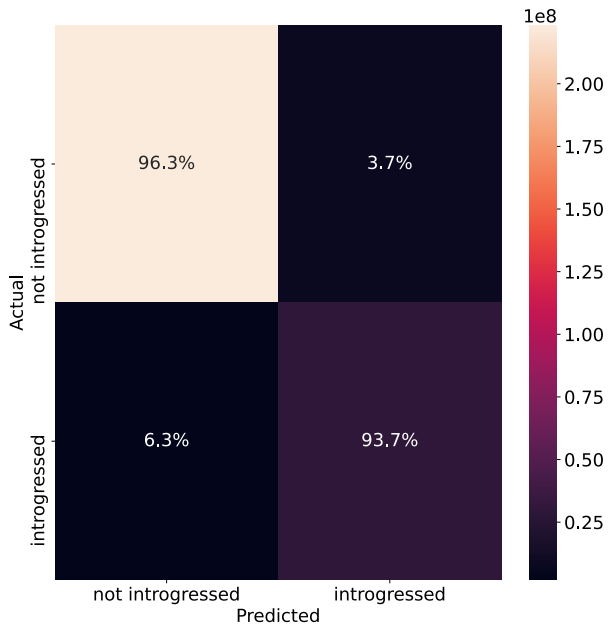

Beneficial:  $s = 1e-6$

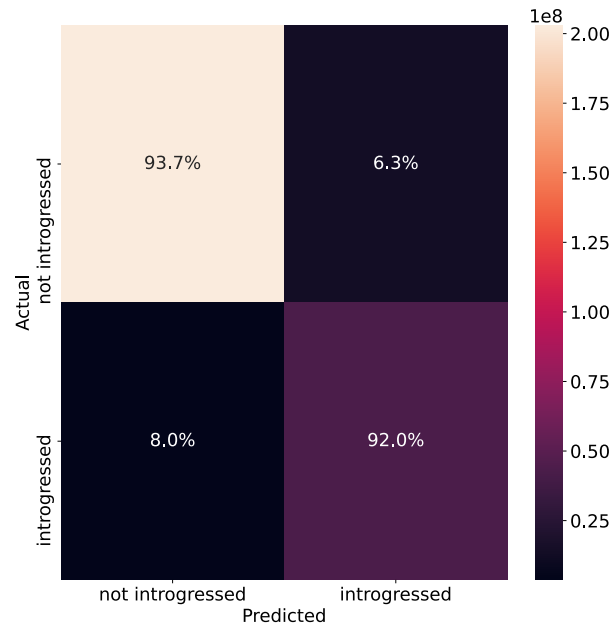

Deleterious:  $s = -1e-5$

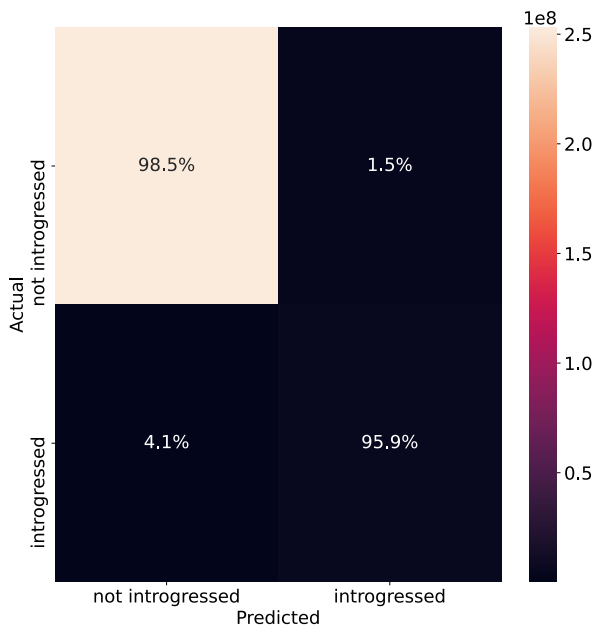

Beneficial:  $s = 1e-5$

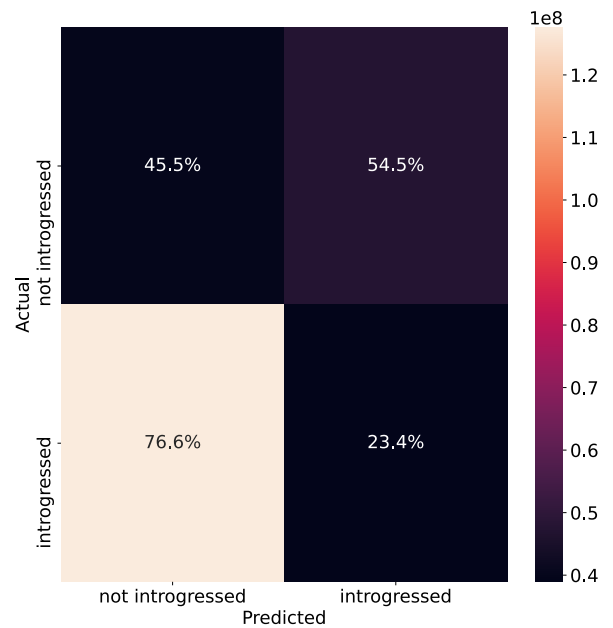

Supplement: pgen.1010657.s007.pdf [file pgen.1010657.s007.pdf]
