# Supplementary material for: IntroUNET: Identifying introgressed alleles via semantic segmentation
Source: PubMed Central journal article supplement (PMC10906877; doi:10.1371/journal.pgen.1010657), 2024-02-20

Mean  $r$  in central 100 kb

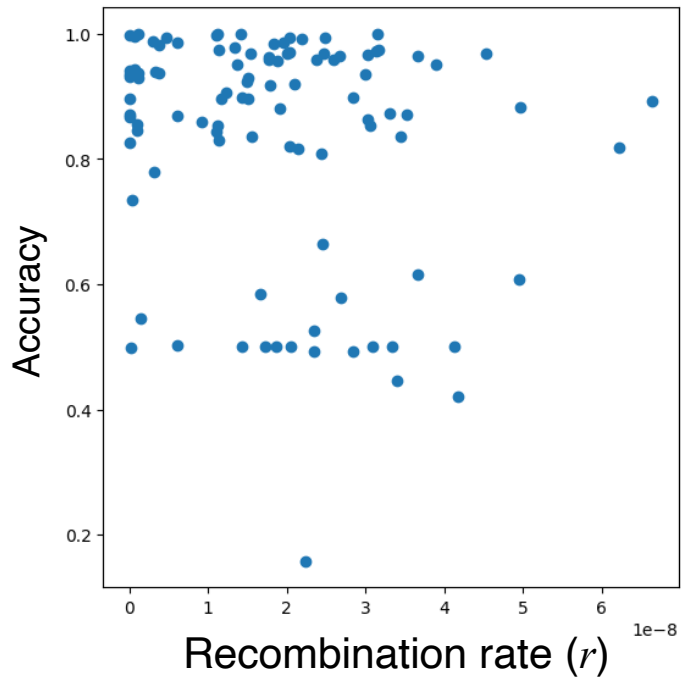

Mean  $r$  in 1 Mb chromosome

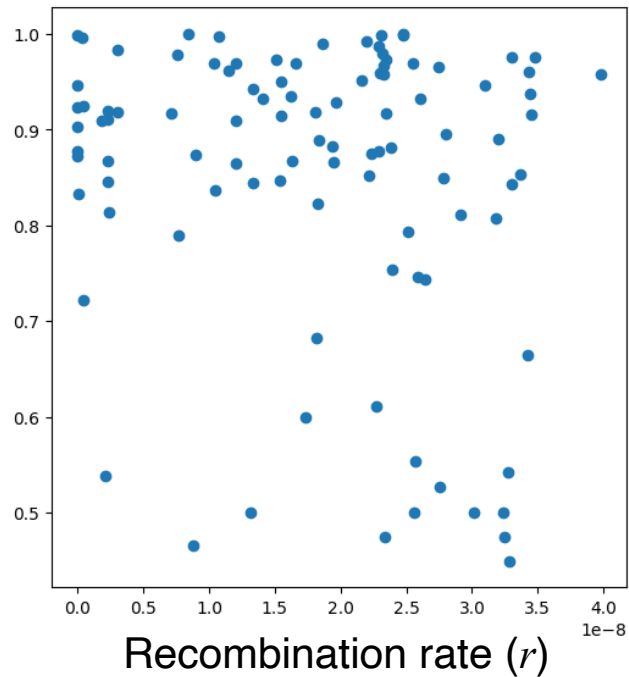

Supplement: pgen.1010657.s010.pdf [file pgen.1010657.s010.pdf]
