# Supplementary material for: IntroUNET: Identifying introgressed alleles via semantic segmentation
Source: PubMed Central journal article supplement (PMC10906877; doi:10.1371/journal.pgen.1010657), 2024-02-20
Supplement: pgen.1010657.s011.pdf [file pgen.1010657.s011.pdf]

A) ROC Curve

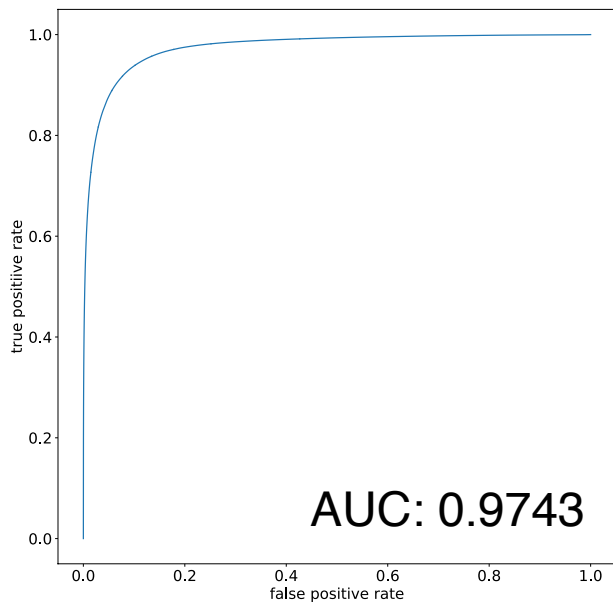

B) Precision-recall curve

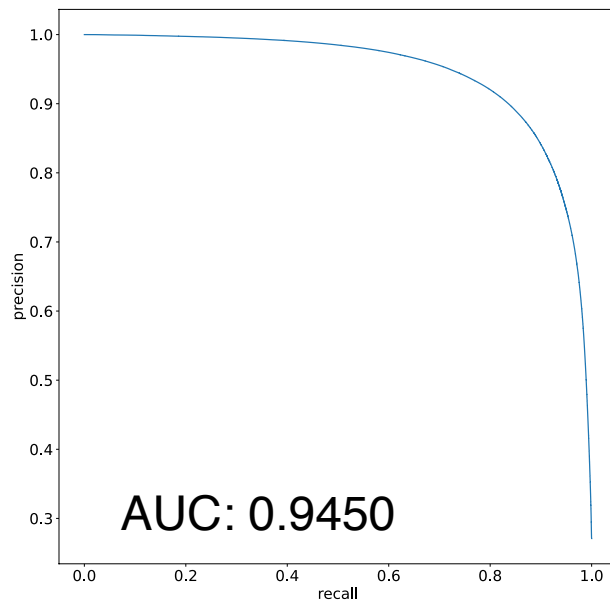

C) Confusion matrix

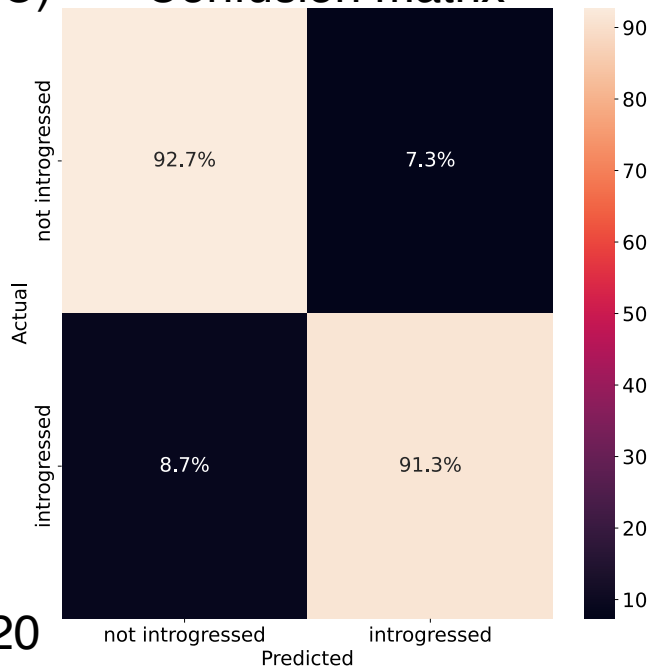

Accuracy: 0.920
