# Supplementary material for: IntroUNET: Identifying introgressed alleles via semantic segmentation
Source: PubMed Central journal article supplement (PMC10906877; doi:10.1371/journal.pgen.1010657), 2024-02-20

**A**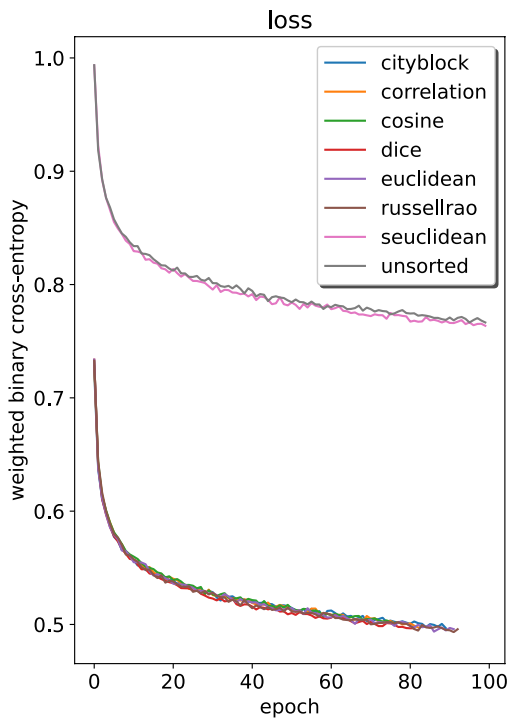**B**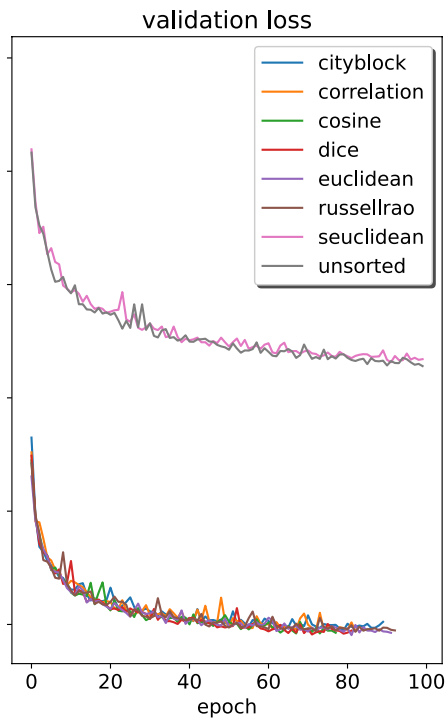**C**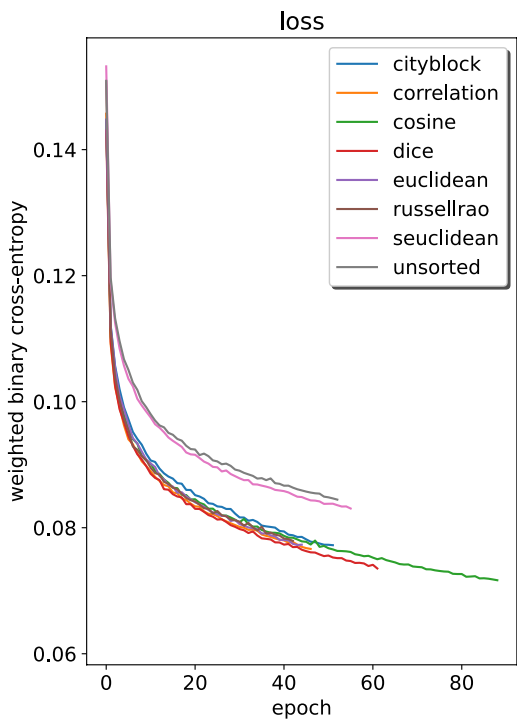**D**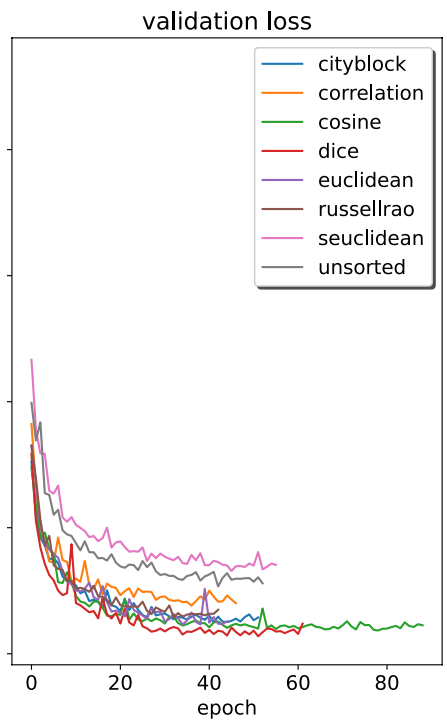

Supplement: pgen.1010657.s018.pdf [file pgen.1010657.s018.pdf]
