# Supplementary material for: IntroUNET: Identifying introgressed alleles via semantic segmentation
Source: PubMed Central journal article supplement (PMC10906877; doi:10.1371/journal.pgen.1010657), 2024-02-20
Supplement: pgen.1010657.s020.pdf [file pgen.1010657.s020.pdf]

| Log-likelihood | AIC      | $N_{ref}$ | $N_{0-sech}$ | $N_{0-sim}$ | $N_{sech}$ | $N_{sim}$ | $t_s$    | $m_{sim \rightarrow sech}$ | $m_{sech \rightarrow sim}$ |
|----------------|----------|-----------|--------------|-------------|------------|-----------|----------|----------------------------|----------------------------|
| -1.54e+03      | 3.1e+03  | 3.27e+05  | 7.47e+04     | 3.27e+06    | 5.94e+06   | 1.55e+04  | 5.31e+04 | 0.0104                     | 0.141                      |
| -1.42e+03      | 2.85e+03 | 2.86e+05  | 7.29e+04     | 2.86e+06    | 5.55e+06   | 1.72e+04  | 5.11e+04 | 0.0136                     | 0.061                      |
| -1.27e+03      | 2.56e+03 | 2.94e+05  | 7.82e+04     | 2.94e+06    | 5.79e+06   | 1.75e+04  | 5.4e+04  | 0.0138                     | 0.05                       |
| -1.28e+03      | 2.58e+03 | 3.04e+05  | 7.81e+04     | 3.04e+06    | 5.46e+06   | 1.79e+04  | 5.36e+04 | 0.0143                     | 0.0648                     |
| -1.26e+03      | 2.54e+03 | 2.88e+05  | 7.42e+04     | 2.88e+06    | 5.14e+06   | 1.73e+04  | 5.12e+04 | 0.0133                     | 0.0595                     |
| -1.27e+03      | 2.55e+03 | 3.12e+05  | 8.1e+04      | 3.12e+06    | 5.7e+06    | 1.8e+04   | 5.53e+04 | 0.0141                     | 0.0694                     |
| -2.99e+03      | 5.99e+03 | 3.56e+04  | 2.54e+04     | 2.02e+05    | 3.43e+06   | 1.84e+04  | 9.49e+04 | 0.00216                    | 0.0204                     |
| -1.15e+03      | 2.32e+03 | 2.91e+05  | 7.67e+04     | 2.91e+06    | 5.16e+06   | 1.65e+04  | 5.24e+04 | 0.0129                     | 0.0528                     |
| -1.07e+03      | 2.15e+03 | 2.84e+05  | 7.16e+04     | 2.84e+06    | 5.16e+06   | 1.62e+04  | 5.06e+04 | 0.0132                     | 0.0589                     |
| -1.64e+03      | 3.29e+03 | 2.91e+05  | 7.25e+04     | 2.93e+05    | 5.15e+06   | 2.06e+04  | 5.51e+04 | 0.0116                     | 0.103                      |
| -1.4e+03       | 2.8e+03  | 3.04e+05  | 7.6e+04      | 3.04e+06    | 5.32e+06   | 1.72e+04  | 5.31e+04 | 0.0136                     | 0.0734                     |
| -2.98e+03      | 5.97e+03 | 3.64e+04  | 2.06e+04     | 2.25e+05    | 3.48e+06   | 1.77e+04  | 9.71e+04 | 0.00216                    | 0.0239                     |
| -1.2e+03       | 2.41e+03 | 2.91e+05  | 7.23e+04     | 2.9e+06     | 5.05e+06   | 1.66e+04  | 5.09e+04 | 0.0132                     | 0.078                      |
| -1.11e+03      | 2.23e+03 | 3.04e+05  | 8.15e+04     | 3.04e+06    | 5.67e+06   | 1.73e+04  | 5.62e+04 | 0.0137                     | 0.0675                     |
| -1.25e+03      | 2.51e+03 | 2.94e+05  | 7.71e+04     | 2.94e+06    | 5.5e+06    | 1.72e+04  | 5.38e+04 | 0.013                      | 0.0571                     |
| -1.31e+03      | 2.64e+03 | 2.95e+05  | 7.98e+04     | 2.95e+06    | 5.42e+06   | 1.69e+04  | 5.34e+04 | 0.0134                     | 0.0529                     |
| -1.14e+03      | 2.29e+03 | 2.73e+05  | 6.64e+04     | 2.73e+06    | 5.14e+06   | 1.56e+04  | 4.78e+04 | 0.0131                     | 0.0573                     |
| -1.23e+03      | 2.48e+03 | 2.95e+05  | 7.16e+04     | 2.95e+06    | 5.44e+06   | 1.72e+04  | 5.06e+04 | 0.0137                     | 0.0626                     |
| -3.13e+03      | 6.27e+03 | 3.62e+04  | 2.42e+04     | 2.84e+05    | 3.46e+06   | 1.79e+04  | 9.44e+04 | 0.00223                    | 0.0225                     |
| -2.96e+03      | 5.94e+03 | 4.24e+04  | 2.53e+04     | 2.99e+05    | 3.58e+06   | 1.84e+04  | 1.01e+05 | 0.00247                    | 0.0255                     |
| -2.89e+03      | 5.79e+03 | 3.95e+04  | 2.42e+04     | 6.15e+04    | 3.6e+06    | 1.79e+04  | 9.48e+04 | 0.0024                     | 0.0213                     |
| -1.24e+03      | 2.49e+03 | 2.94e+05  | 7.79e+04     | 2.94e+06    | 5.82e+06   | 1.66e+04  | 5.38e+04 | 0.013                      | 0.0662                     |
| -1.43e+03      | 2.88e+03 | 2.98e+05  | 7.5e+04      | 2.98e+06    | 5.47e+06   | 1.77e+04  | 5.17e+04 | 0.0144                     | 0.0688                     |
| -1.29e+03      | 2.6e+03  | 3.08e+05  | 7.78e+04     | 3.08e+06    | 5.69e+06   | 1.74e+04  | 5.55e+04 | 0.0132                     | 0.0848                     |
| -1.33e+03      | 2.66e+03 | 3.01e+05  | 7.75e+04     | 3.01e+06    | 5.66e+06   | 1.74e+04  | 5.3e+04  | 0.0137                     | 0.0567                     |
| -1.27e+03      | 2.56e+03 | 2.87e+05  | 7.73e+04     | 2.87e+06    | 5.05e+06   | 1.66e+04  | 5.19e+04 | 0.0133                     | 0.0649                     |
| -2.88e+03      | 5.78e+03 | 3.87e+04  | 2.57e+04     | 3.87e+05    | 3.44e+06   | 1.86e+04  | 9.52e+04 | 0.00236                    | 0.0231                     |
| -1.31e+03      | 2.62e+03 | 3e+05     | 7.83e+04     | 3e+06       | 5.68e+06   | 1.71e+04  | 5.43e+04 | 0.0136                     | 0.0767                     |
| -1.26e+03      | 2.53e+03 | 3.05e+05  | 8.19e+04     | 3.05e+06    | 5.85e+06   | 1.78e+04  | 5.47e+04 | 0.0135                     | 0.0542                     |
| -1.34e+03      | 2.69e+03 | 3.01e+05  | 7.67e+04     | 3.01e+06    | 5.65e+06   | 1.75e+04  | 5.31e+04 | 0.0134                     | 0.0666                     |
| -1.35e+03      | 2.72e+03 | 2.94e+05  | 7.76e+04     | 2.94e+06    | 5.47e+06   | 1.72e+04  | 5.29e+04 | 0.0131                     | 0.0654                     |
| -2.68e+03      | 5.38e+03 | 3.72e+04  | 2.5e+04      | 3.72e+05    | 3.72e+06   | 1.91e+04  | 9.91e+04 | 0.00239                    | 0.0189                     |
| -1.28e+03      | 2.57e+03 | 2.81e+05  | 7.61e+04     | 2.81e+06    | 5.43e+06   | 1.66e+04  | 5.15e+04 | 0.0134                     | 0.0642                     |
| -2.84e+03      | 5.69e+03 | 3.66e+04  | 2.58e+04     | 3.11e+05    | 3.52e+06   | 1.79e+04  | 9.72e+04 | 0.00221                    | 0.0195                     |
| -1.18e+03      | 2.36e+03 | 2.93e+05  | 7.66e+04     | 2.93e+06    | 5.32e+06   | 1.65e+04  | 5.23e+04 | 0.0134                     | 0.0628                     |
| -1.26e+03      | 2.54e+03 | 2.9e+05   | 7.13e+04     | 2.9e+06     | 5.42e+06   | 1.65e+04  | 5.01e+04 | 0.0133                     | 0.0538                     |
| -3e+03         | 6.01e+03 | 4.94e+04  | 2.75e+04     | 4.94e+05    | 3.29e+06   | 1.74e+04  | 9.03e+04 | 0.00318                    | 0.028                      |
| -1.24e+03      | 2.49e+03 | 2.92e+05  | 7.67e+04     | 2.92e+06    | 5.66e+06   | 1.74e+04  | 5.24e+04 | 0.0139                     | 0.0415                     |
| -1.35e+03      | 2.71e+03 | 3.04e+05  | 7.74e+04     | 3.04e+06    | 5.33e+06   | 1.7e+04   | 5.32e+04 | 0.0138                     | 0.0694                     |
| -2.51e+03      | 5.04e+03 | 3.57e+04  | 2.37e+04     | 1.51e+05    | 3.47e+06   | 1.66e+04  | 9.52e+04 | 0.00231                    | 0.0225                     |
| -1.23e+03      | 2.48e+03 | 2.8e+05   | 7.53e+04     | 2.8e+06     | 5.55e+06   | 1.67e+04  | 5.18e+04 | 0.0127                     | 0.0531                     |
| -1.35e+03      | 2.72e+03 | 2.9e+05   | 7.16e+04     | 2.9e+06     | 5.29e+06   | 1.65e+04  | 5.18e+04 | 0.0134                     | 0.082                      |
| -2.72e+03      | 5.45e+03 | 3.61e+04  | 2.45e+04     | 3.39e+05    | 3.55e+06   | 1.81e+04  | 9.61e+04 | 0.00218                    | 0.0196                     |
| -1.22e+03      | 2.46e+03 | 3.04e+05  | 7.81e+04     | 3.04e+06    | 5.38e+06   | 1.77e+04  | 5.51e+04 | 0.0139                     | 0.0688                     |
| -1.26e+03      | 2.53e+03 | 3.04e+05  | 7.64e+04     | 3.04e+06    | 5.86e+06   | 1.78e+04  | 5.5e+04  | 0.013                      | 0.0623                     |
| -1.71e+03      | 3.44e+03 | 3.27e+05  | 7.92e+04     | 3.27e+06    | 5.2e+06    | 1.92e+04  | 5.03e+04 | 0.0145                     | 0.00148                    |
| -1.74e+03      | 3.5e+03  | 2.21e+05  | 9.07e+04     | 2.21e+06    | 5.34e+06   | 1.89e+04  | 5.43e+04 | 0.0128                     | 0.0317                     |
| -2.68e+03      | 5.38e+03 | 3.4e+04   | 2.81e+04     | 2e+05       | 3.2e+06    | 1.84e+04  | 9.06e+04 | 0.00232                    | 0.0191                     |
| -2.72e+03      | 5.45e+03 | 3.69e+04  | 2.3e+04      | 8.31e+04    | 3.39e+06   | 1.76e+04  | 9.06e+04 | 0.00233                    | 0.022                      |
| -1.25e+03      | 2.51e+03 | 2.93e+05  | 7.76e+04     | 2.93e+06    | 5.43e+06   | 1.7e+04   | 5.19e+04 | 0.0138                     | 0.0555                     |
| -1.1e+03       | 2.22e+03 | 3.09e+05  | 7.59e+04     | 3.09e+06    | 5.76e+06   | 1.72e+04  | 5.47e+04 | 0.0133                     | 0.0786                     |
| -1.19e+03      | 2.39e+03 | 2.94e+05  | 7.38e+04     | 2.94e+06    | 5.64e+06   | 1.62e+04  | 5.22e+04 | 0.0137                     | 0.0796                     |
| -2.81e+03      | 5.64e+03 | 1.49e+05  | 4.99e+04     | 2.64e+04    | 3.46e+06   | 1.62e+04  | 7.95e+04 | 0.00791                    | 0.0968                     |
| -1.28e+03      | 2.58e+03 | 2.95e+05  | 7.57e+04     | 2.95e+06    | 5.31e+06   | 1.69e+04  | 5.26e+04 | 0.0137                     | 0.0771                     |
| -1.25e+03      | 2.51e+03 | 3e+05     | 7.56e+04     | 3e+06       | 5.6e+06    | 1.7e+04   | 5.27e+04 | 0.0135                     | 0.0696                     |
| -1.33e+03      | 2.67e+03 | 2.98e+05  | 8.09e+04     | 2.98e+06    | 5.84e+06   | 1.78e+04  | 5.51e+04 | 0.0139                     | 0.0645                     |
| -1.03e+03      | 2.08e+03 | 2.92e+05  | 7.14e+04     | 2.56e+06    | 5.51e+06   | 1.62e+04  | 5.19e+04 | 0.0134                     | 0.0801                     |

Table S1: Bootstrap parameter estimates for the *D. simulans* and *D. sechellia* joint demographic model obtained via  $\partial a \partial i$ . The parameters of the model are the ancestral population size ( $N_{ref}$ ), the final population sizes of *D. sechellia* and *D. simulans* ( $N_{0-sech}$  and  $N_{0-sim}$ ), the initial population sizes ( $N_{sech}$  and  $N_{sim}$ ), the population split time ( $t_s$ ), and the backwards migration rates ( $m_{sim \rightarrow sech}$  and  $m_{sech \rightarrow sim}$ ). Note that parameter estimates are shown for each bootstrap replicate for which our optimization procedure succeeded (Methods), but only those with log-likelihood scores greater than  $-1750$  were used to simulate training data.
