# Supplementary material for: IntroUNET: Identifying introgressed alleles via semantic segmentation
Source: PubMed Central journal article supplement (PMC10906877; doi:10.1371/journal.pgen.1010657), 2024-02-20
Supplement: pgen.1010657.s021.pdf [file pgen.1010657.s021.pdf]

| Method and problem                             | Simulation (100k sims) | Formatting      | Discriminator training | Segmenter training |
|------------------------------------------------|------------------------|-----------------|------------------------|--------------------|
| IntroUNET: simple bidirectional scenario       | 100.1 h                | 29 h            | 0.6 h                  | 4.6 h              |
|                                                | 110kb                  | (2, 64, 128)    |                        |                    |
| IntroUNET: Drosophila simulans-sechellia model | 4.9 h                  | 21.2 h          | 0.9 h                  | 3.7 h              |
|                                                | 10kb                   | (2, 32, 128)    |                        |                    |
| IntroUNET: Archaic introgression model         | 10.7 h                 | 48.5 h          | N/A                    | 8.3 h              |
|                                                | 1Mb                    | (2, 112, 192)   |                        |                    |
| ArchIE: Archaic introgression model            | 10.7 h                 | 107.4 h<br>50kb | N/A                    | 7 min              |

Table S2: CPU / GPU time estimates for accomplishing the experiments in the paper. The simulation and formatting results for this table were computed from a small sample of 430 replicates over 4 cores of an Intel Core i9-9900K CPU @ 3.60GHz and then scaled to give estimates for  $10^5$  replicates in each case. The Formatting column lists the time estimates for alignment sorting (for **IntroUNET**) and statistic calculation (for **ArchIE**). The Discriminator and Segmenter columns list the training times for classifying entire windows and for identifying introgressed haplotypes, respectively. In the GPU columns the estimate is simply the run time for the training described. The training of the neural networks was done on an NVIDIA A40 GPU, and we found that VRAM usage was  $<12\text{Gb}$  in all cases. We note that the **ArchIE** method computes statistics over the entire simulated window (224.64 on average in our simulated 50kb windows) whereas our method only formats a small sequential sample of SNPs from each replicate (192 for the Archaic introgression program). Below the time estimates for simulation are the simulated region size, and below the formatting times are the resulting “image” size or (populations, individuals, sites) and for the case of **ArchIE**, the window size in base pairs. Note that we do not include the time for execution on data after training, but we observed that classification times for all are generally negligible (although the sorting/statistic calculation steps must be performed first and these can be costly as shown in the Formatting section).
